# Supplementary material
Source: Springer Nature journal article supplement (https://www.springermedizin.de/resource/supplementary/13012_2012_594_MOESM11_ESM.pdf/9630336)
Supplement: MOESM11 [file 9630336]

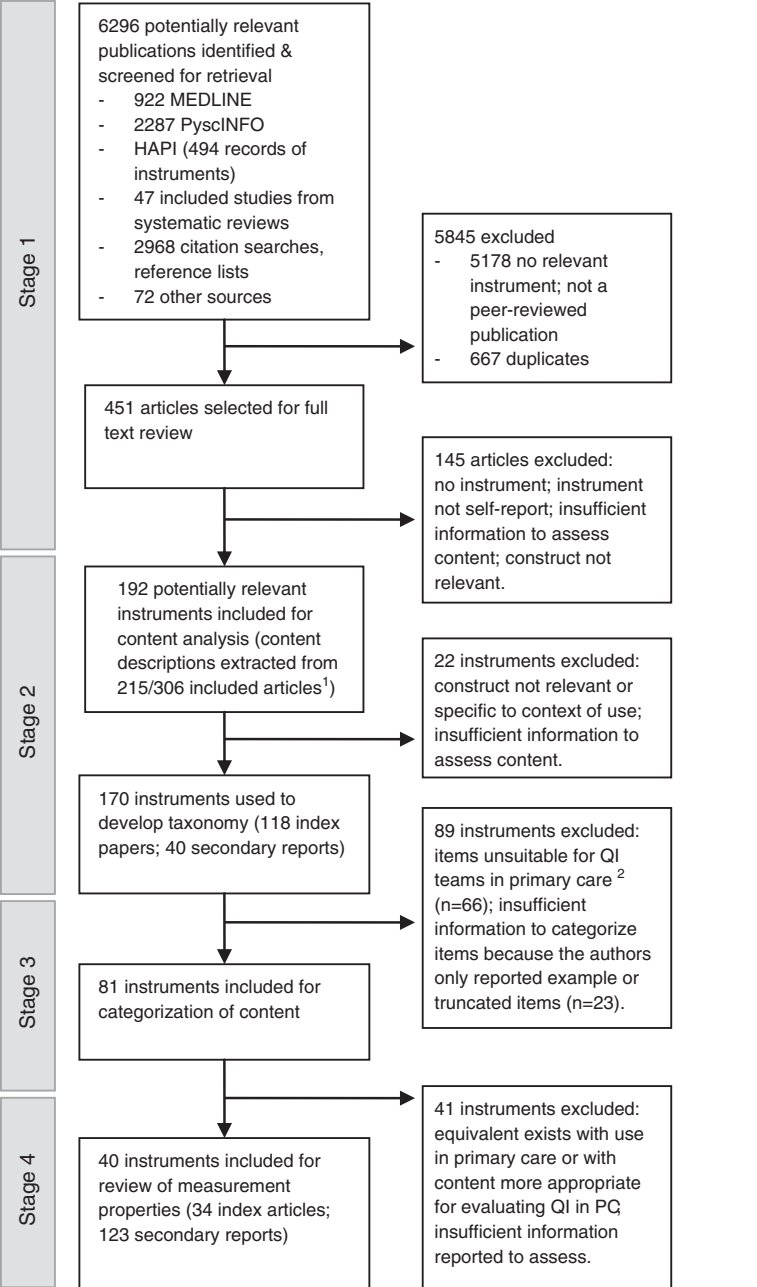

<sup>1</sup>Remainder of 306 articles (n=91) were secondary reports that did not contribute additional information about instrument content. These were retained for assessment of measurement properties if required when final set of studies for inclusion in Stage 4 was determined.

<sup>2</sup>Instruments considered unsuitable were those (i) with content intended for a specific context of use (e.g., Poulton's measure of team effectiveness has multiple items specific to the UK National Health Service [47]; Schroder's collaborative practice assessment tool is intended for clinical care teams [70]), (ii) with content adequately covered by more suitable instruments (e.g., measures of transformational leadership (e.g. [71]) were excluded because we identified multiple measures of leadership in relation to teamwork), and (iii) instruments that, on further analysis, were not self-report measures (e.g., Irvine's team problem solving effectiveness scale requires document analysis [72]).
